# Supplementary material for: Nicotine exposure during differentiation causes inhibition of N-myc expression
Source: PubMed Central journal article supplement (PMC3828478; doi:10.1186/1465-9921-14-119), 2013-11-05
Supplement: 1465-9921-14-119-S1.pdf [file 1465-9921-14-119-S1.pdf]

## Supplementary Data

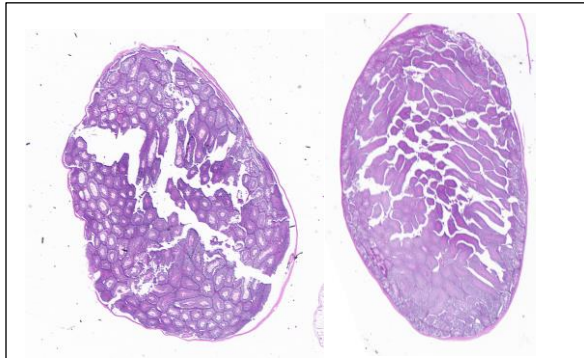

Supplementary Figure: Differentiated nhpESC do not form Teratomas. Left Panel: Histology of testes from nude mice 6 months after injection with approximately  $5 \times 10^5$  nhpESC. Histology is the same as Right Panel: negative control, wherein testes were injected with adult primary NHP fibroblasts.

Supplementary Table 1: Table of genes significantly changed after analysis of GeneChip Rhesus Macaqua Genome Array from Affymetrix. The table lists genes and genetic loci that were changed as a result of 100 nM nicotine treatment during differentiation of nhpESC from pluripotency to fibroblast-like cells,  $p < 0.001$ .

|    | <b>Parametric p-value</b> | <b>Gene symbol</b>        | <b>Description</b>                                                           |
|----|---------------------------|---------------------------|------------------------------------------------------------------------------|
| 1  | 1.06E-05                  | <a href="#">LOC702700</a> | similar to choline/ethanolaminephosphotransferase                            |
| 2  | 1.67E-05                  | <a href="#">MYCN</a>      | v-myc myelocytomatosis viral related oncogene, neuroblastoma derived (avian) |
| 3  | 2.82E-05                  | <a href="#">GSTT2</a>     | glutathione S-transferase theta 2                                            |
| 4  | 3.79E-05                  | <a href="#">SAMHD1</a>    | SAM domain and HD domain 1                                                   |
| 5  | 6.12E-05                  | <a href="#">LOC705398</a> | similar to ribosome associated membrane protein 4                            |
| 6  | 7.01E-05                  | <a href="#">LOC696076</a> | similar to cytochrome P450, family 2, subfamily U, polypeptide 1             |
| 7  | 7.96E-05                  | <a href="#">LOC708713</a> | similar to F56A8.1                                                           |
| 8  | 9.13E-05                  | <a href="#">LOC716117</a> | similar to hairy/enhancer-of-split related with YRPW motif-like              |
| 9  | 9.25E-05                  | <a href="#">F11R</a>      | F11 receptor                                                                 |
| 10 | 9.84E-05                  | <a href="#">LOC697751</a> | hypothetical protein LOC697751                                               |

|    |          |                           |                                                                                                                            |
|----|----------|---------------------------|----------------------------------------------------------------------------------------------------------------------------|
| 11 | 0.000113 | <a href="#">LOC704106</a> | similar to guanine nucleotide binding protein (G protein), alpha activating activity polypeptide, olfactory type isoform 1 |
| 12 | 0.000113 | <a href="#">LOC704953</a> | similar to longevity assurance homolog 6                                                                                   |
| 13 | 0.000116 | <a href="#">CXCL10</a>    | chemokine (C-X-C motif) ligand 10                                                                                          |
| 14 | 0.000129 | <a href="#">SLC16A2</a>   | solute carrier family 16, member 2                                                                                         |
| 15 | 0.000135 | <a href="#">LOC706073</a> | similar to cyclic nucleotide gated channel beta 1                                                                          |
| 16 | 0.000136 | <a href="#">LOC719634</a> | similar to regulator of G-protein signalling 3 isoform 5                                                                   |
| 17 | 0.000137 | <a href="#">LOC711079</a> | hypothetical protein LOC711079                                                                                             |
| 18 | 0.000147 | <a href="#">GPR158</a>    | G protein-coupled receptor 158                                                                                             |
| 19 | 0.000153 | <a href="#">LOC705497</a> | similar to transforming, acidic coiled-coil containing protein 2 isoform d                                                 |
| 20 | 0.000161 | <a href="#">LOC721695</a> | similar to Nucleoside diphosphate-linked moiety X motif 8, mitochondrial precursor (Nudix motif 8)                         |
| 21 | 0.000162 | <a href="#">LOC712589</a> | similar to ATPase, Class VI, type 11A isoform b                                                                            |
| 22 | 0.000163 | <a href="#">IFNA14</a>    | interferon, alpha 14                                                                                                       |
| 23 | 0.000165 | <a href="#">LOC700632</a> | similar to tumor protein p53 inducible nuclear protein 1                                                                   |
| 24 | 0.000165 | <a href="#">LOC721873</a> | similar to squamous cell carcinoma antigen recognized by T cells 1                                                         |
| 25 | 0.000166 | <a href="#">LOC707383</a> | similar to amyloid beta (A4) precursor protein-binding, family B, member 1 interacting protein                             |
| 26 | 0.000171 | <a href="#">LOC693274</a> | similar to NGFI-A binding protein 1                                                                                        |
| 27 | 0.000197 | <a href="#">LOC715297</a> | similar to N-ethylmaleimide-sensitive factor                                                                               |
| 28 | 0.000203 | <a href="#">LOC700715</a> | similar to copine family member IX                                                                                         |
| 29 | 0.000204 | <a href="#">LOC701602</a> | similar to inter-alpha (globulin) inhibitor H5                                                                             |
| 30 | 0.000209 | <a href="#">LOC712994</a> | similar to secreted modular calcium-binding protein 1 isoform 2                                                            |
| 31 | 0.000221 | <a href="#">LOC712932</a> | similar to Ku70-binding protein 3                                                                                          |
| 32 | 0.000228 | <a href="#">FMO4</a>      | flavin containing monooxygenase 4                                                                                          |
| 33 | 0.000243 | <a href="#">LOC715297</a> | similar to N-ethylmaleimide-sensitive factor                                                                               |
| 34 | 0.00025  | <a href="#">MT</a>        | mitochondrial malonyltransferase                                                                                           |
| 35 | 0.000254 | <a href="#">SRD5A2</a>    | steroid-5-alpha-reductase, alpha polypeptide 2 (3-oxo-5 alpha-steroid delta 4-dehydrogenase alpha 2)                       |
| 36 | 0.00026  | <a href="#">LOC712374</a> | similar to CG14535-PA                                                                                                      |
| 37 | 0.000265 | <a href="#">LOC713280</a> | similar to meningioma 1                                                                                                    |
| 38 | 0.000285 | <a href="#">LOC695267</a> | similar to supervillin isoform 2                                                                                           |
| 39 | 0.000287 | <a href="#">LOC695267</a> | similar to supervillin isoform 2                                                                                           |
| 40 | 0.000292 | <a href="#">CXCL10</a>    | chemokine (C-X-C motif) ligand 10                                                                                          |
| 41 | 0.000298 | <a href="#">LOC702886</a> | similar to E74-like factor 4 (ets domain transcription factor)                                                             |

|    |          |                           |                                                                                                                                                                                                                                                             |
|----|----------|---------------------------|-------------------------------------------------------------------------------------------------------------------------------------------------------------------------------------------------------------------------------------------------------------|
| 42 | 0.000304 | <a href="#">LOC719482</a> | similar to chromosome 10 open reading frame 64                                                                                                                                                                                                              |
| 43 | 0.000304 | <a href="#">LOC705975</a> | similar to cyclin-dependent kinase-like 1                                                                                                                                                                                                                   |
| 44 | 0.000316 | <a href="#">LOC700866</a> | hypothetical protein LOC700866                                                                                                                                                                                                                              |
| 45 | 0.00032  | <a href="#">LOC707725</a> | similar to platelet-derived growth factor alpha isoform 2 preproprotein                                                                                                                                                                                     |
| 46 | 0.000336 | <a href="#">LOC697003</a> | similar to ovary-specific acidic protein                                                                                                                                                                                                                    |
| 47 | 0.000341 | <a href="#">F11R</a>      | F11 receptor                                                                                                                                                                                                                                                |
| 48 | 0.000355 | <a href="#">LOC705032</a> | similar to SLIT and NTRK-like family, member 5                                                                                                                                                                                                              |
| 49 | 0.000365 | <a href="#">PA2G4</a>     | proliferation-associated 2G4, 38kDa                                                                                                                                                                                                                         |
| 50 | 0.000372 | <a href="#">LOC704106</a> | similar to guanine nucleotide binding protein (G protein), alpha activating activity polypeptide, olfactory type isoform 1                                                                                                                                  |
| 51 | 0.000373 | <a href="#">LOC706437</a> | hypothetical protein LOC706437                                                                                                                                                                                                                              |
| 52 | 0.000401 | <a href="#">LOC715100</a> | similar to mitochondrial ribosomal protein L4 isoform a                                                                                                                                                                                                     |
| 53 | 0.000403 | <a href="#">LOC700135</a> | similar to Probable ubiquitin carboxyl-terminal hydrolase FAF-X (Ubiquitin thioesterase FAF-X) (Ubiquitin-specific-processing protease FAF-X) (Deubiquitinating enzyme FAF-X) (Fat facets protein-related, X-linked) (Ubiquitin-specific protease 9, X c... |
| 54 | 0.000404 | <a href="#">LOC706304</a> | hypothetical protein LOC706304                                                                                                                                                                                                                              |
| 55 | 0.000406 | <a href="#">CPA4</a>      | carboxypeptidase A4                                                                                                                                                                                                                                         |
| 56 | 0.000506 | <a href="#">SMAD1</a>     | SMAD family member 1                                                                                                                                                                                                                                        |
| 57 | 0.000516 | <a href="#">LOC699343</a> | similar to spermatogenesis associated 11                                                                                                                                                                                                                    |
| 58 | 0.000568 | <a href="#">LOC708498</a> | similar to hippocampus abundant transcript-like 1                                                                                                                                                                                                           |
| 59 | 0.000588 | <a href="#">LOC709833</a> | hypothetical protein LOC709833                                                                                                                                                                                                                              |
| 60 | 0.000593 | <a href="#">LOC715058</a> | similar to zinc finger, matrin type 5                                                                                                                                                                                                                       |
| 61 | 0.000605 | <a href="#">LOC694299</a> | similar to serum deprivation response protein                                                                                                                                                                                                               |
| 62 | 0.000611 | <a href="#">IVD</a>       | isovaleryl Coenzyme A dehydrogenase                                                                                                                                                                                                                         |
| 63 | 0.000613 | <a href="#">LOC715394</a> | similar to laminin alpha 2 subunit precursor                                                                                                                                                                                                                |
| 64 | 0.000616 | <a href="#">LOC696973</a> | similar to SWI/SNF-related matrix-associated actin-dependent regulator of chromatin a2 isoform a                                                                                                                                                            |
| 65 | 0.000633 | <a href="#">LOC716726</a> | similar to isocitrate dehydrogenase 3, beta subunit isoform b precursor                                                                                                                                                                                     |
| 66 | 0.000638 | <a href="#">HSPB8</a>     | heat shock 22kDa protein 8                                                                                                                                                                                                                                  |
| 67 | 0.000646 | <a href="#">ALK</a>       | anaplastic lymphoma kinase (Ki-1)                                                                                                                                                                                                                           |
| 68 | 0.000649 | <a href="#">ZNF436</a>    | zinc finger protein 436                                                                                                                                                                                                                                     |
| 69 | 0.000654 | <a href="#">LOC713549</a> | similar to 3-hydroxysteroid epimerase                                                                                                                                                                                                                       |
| 70 | 0.00067  | <a href="#">LOC694369</a> | similar to G protein-regulated inducer of neurite outgrowth 2 (GRIN2)                                                                                                                                                                                       |
| 71 | 0.000673 | <a href="#">LOC694818</a> | similar to cytochrome b reductase 1                                                                                                                                                                                                                         |

|    |          |                                                               |                                                                                                  |
|----|----------|---------------------------------------------------------------|--------------------------------------------------------------------------------------------------|
| 72 | 0.000674 | <a href="#">OGFR</a>                                          | opioid growth factor receptor                                                                    |
| 73 | 0.000676 | <a href="#">LOC695466</a>                                     | similar to scavenger receptor class F, member 2 isoform 2                                        |
| 74 | 0.000697 | <a href="#">LOC713232</a>                                     | similar to phospholipid scramblase 1                                                             |
| 75 | 0.000704 | <a href="#">LOC693823</a>                                     | similar to LPS-responsive vesicle trafficking, beach and anchor containing                       |
| 76 | 0.000718 |                                                               |                                                                                                  |
| 77 | 0.000735 | <a href="#">LOC693823</a>                                     | similar to LPS-responsive vesicle trafficking, beach and anchor containing                       |
| 78 | 0.000749 |                                                               | Cytidine monophosphate N-acetylneuraminic acid synthetase                                        |
| 79 | 0.000753 | <a href="#">LOC715394</a>                                     | similar to laminin alpha 2 subunit precursor                                                     |
| 80 | 0.000761 | <a href="#">LOC696973</a>                                     | similar to SWI/SNF-related matrix-associated actin-dependent regulator of chromatin a2 isoform a |
| 81 | 0.000763 | <a href="#">SLC11A2</a>                                       | solute carrier family 11 (proton-coupled divalent metal ion transporters), member 2              |
| 82 | 0.000764 | <a href="#">LOC697117</a>                                     | similar to absent in melanoma 1                                                                  |
| 83 | 0.000764 | <a href="#">LOC695267</a>                                     | similar to supervillin isoform 2                                                                 |
| 84 | 0.000792 | <a href="#">LOC702799</a>                                     | hypothetical protein LOC702799                                                                   |
| 85 | 0.000796 |                                                               | Similar to 60S ribosomal protein L21                                                             |
| 86 | 0.000823 | <a href="#">LOC709054</a><br>///<br><a href="#">LOC711640</a> | hypothetical protein LOC709054 /// similar to CDK2-associated protein 2                          |
| 87 | 0.000831 | <a href="#">GNAI2</a>                                         | guanine nucleotide binding protein (G protein), alpha inhibiting activity polypeptide 2          |
| 88 | 0.000845 | <a href="#">LOC715853</a>                                     | similar to interphase cytoplasmic foci protein 45                                                |
| 89 | 0.000866 | <a href="#">SEMG1</a>                                         | semenogelin I                                                                                    |
| 90 | 0.000891 | <a href="#">LOC715195</a>                                     | similar to SRR1-like protein                                                                     |
| 91 | 0.000897 | <a href="#">TNIK</a>                                          | TRAF2 and NCK interacting kinase                                                                 |
| 92 | 0.000911 | <a href="#">LOC714530</a>                                     | similar to growth arrest-specific 2 like 1 isoform a                                             |
| 93 | 0.000918 | <a href="#">LOC720175</a>                                     | similar to proteasome (prosome, macropain) subunit, alpha type 7                                 |
| 94 | 0.00093  | <a href="#">LOC721230</a>                                     | similar to tumor suppressing subtransferable candidate 5                                         |
| 95 | 0.000935 | <a href="#">LOC722609</a>                                     | similar to WD repeat domain 34                                                                   |
| 96 | 0.000952 | <a href="#">LOC716166</a>                                     | similar to Sjogrens syndrome/scleroderma autoantigen 1                                           |
| 97 | 0.000987 | <a href="#">LOC701345</a>                                     | similar to neurogenin 2                                                                          |
| 98 | 0.000989 | <a href="#">LOC722330</a>                                     | similar to phosphofructokinase, platelet                                                         |
| 99 | 0.000996 | <a href="#">LOC706437</a>                                     | hypothetical protein LOC706437                                                                   |
